# Supplementary material
Source: Elsevier journal article supplement (https://comptes-rendus.academie-sciences.fr/geoscience/article/10.1016/j.crte.2017.08.003/file/attach/mmc3.pdf)
Supplement: mmc3 [file mmc3.pdf]

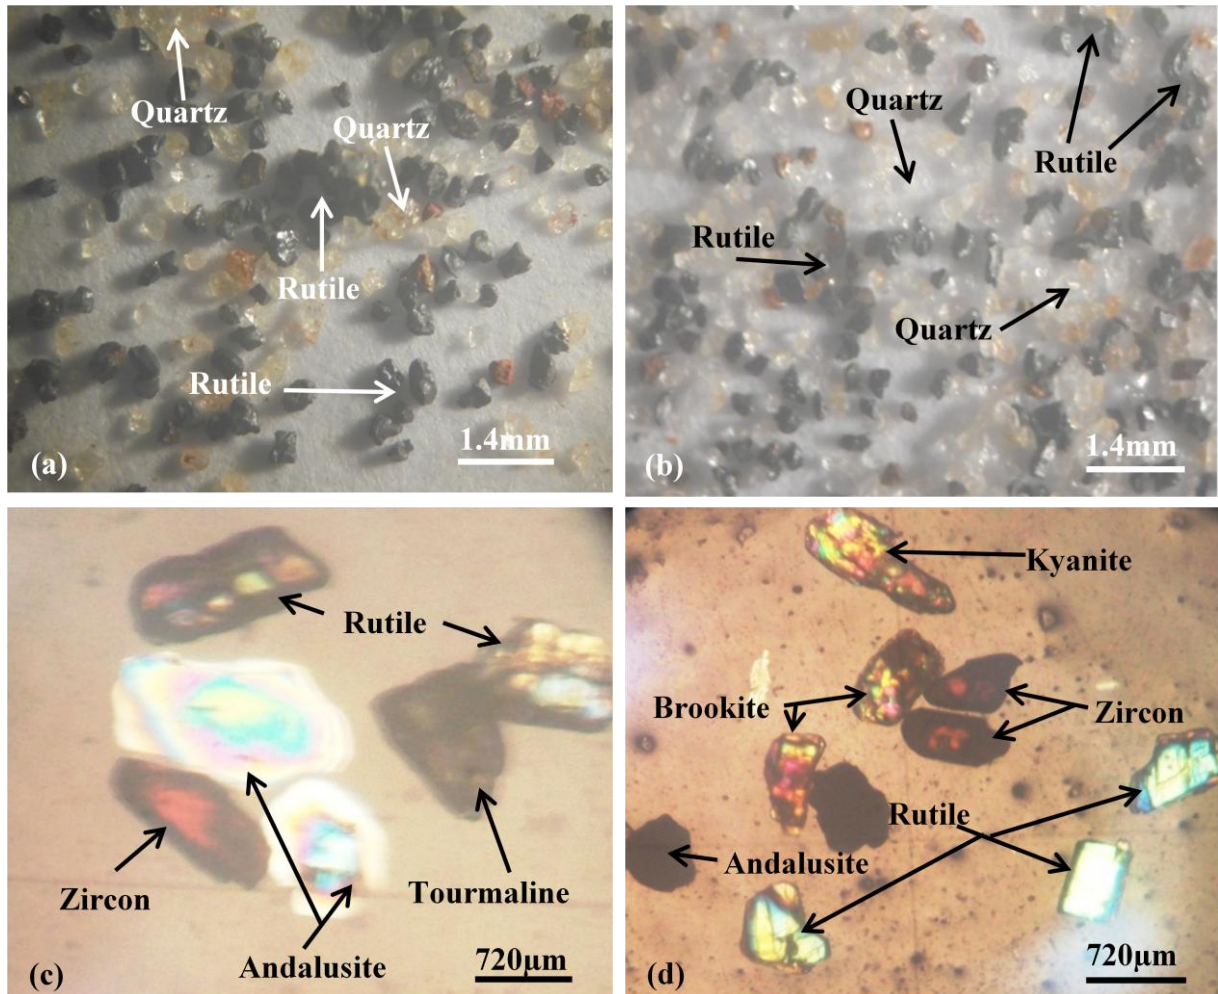

Figure 2. Morphological aspects of some heavy minerals (rutile, quartz, tourmaline, andalusite, zircon, brookite and kyanite): hand samples (a-b) and under the binocular magnifying glass (c-d).
